# Supplementary material
Source: PubMed Central journal article supplement (PMC3977615)

## SUPPLEMENTAL MATERIAL

Supplemental Table I. Collateral Grade Based on Site of Initial Vascular Occlusion.

| Collateral Grade | Occlusion Location |              |      |                        |     |    |           |             |    |    |    |    |     |
|------------------|--------------------|--------------|------|------------------------|-----|----|-----------|-------------|----|----|----|----|-----|
|                  | Frequency          | Extracranial | ICAT | Other intracranial ICA | ACA | M1 | Single M2 | Multiple M2 | M3 | M4 | VA | BA | PCA |
| 0                | 0                  | 2            | 0    | 0                      | 5   | 7  | 2         | 1           | 1  | 0  | 0  | 1  | 19  |
| 1                | 1                  | 4            | 4    | 1                      | 15  | 14 | 4         | 6           | 1  | 0  | 1  | 2  | 53  |
| 2                | 1                  | 6            | 6    | 1                      | 50  | 20 | 11        | 8           | 3  | 0  | 1  | 1  | 108 |
| 3                | 2                  | 9            | 3    | 0                      | 50  | 14 | 4         | 4           | 1  | 0  | 1  | 0  | 88  |
| 4                | 0                  | 2            | 1    | 0                      | 4   | 0  | 0         | 1           | 0  | 0  | 0  | 0  | 8   |
| N/A              | 2                  | 20           | 10   | 0                      | 12  | 6  | 1         | 0           | 0  | 1  | 1  | 2  | 55  |
| Total            | 6                  | 43           | 24   | 2                      | 136 | 61 | 22        | 20          | 6  | 1  | 4  | 6  | 331 |

Supplemental Figure I. Proportion (95% CI) of Good Clinical Outcome (90 day mRS $\leq$ 2) by Collateral Grade and Reperfusion.

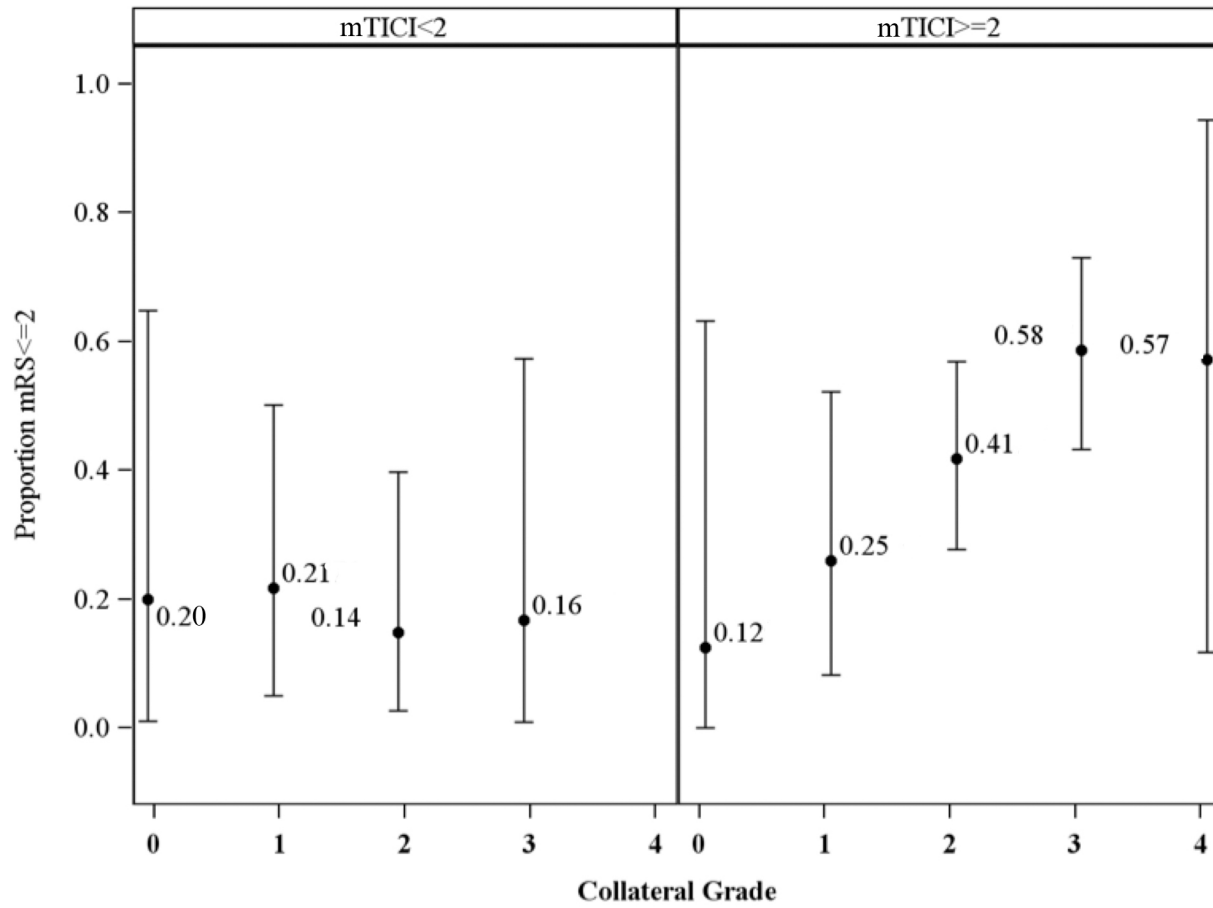

Supplemental Figure II. Proportion (95% CI) of Good Clinical Outcome (90 day mRS $\leq$ 2) by Collateral Grade and Recanalization.

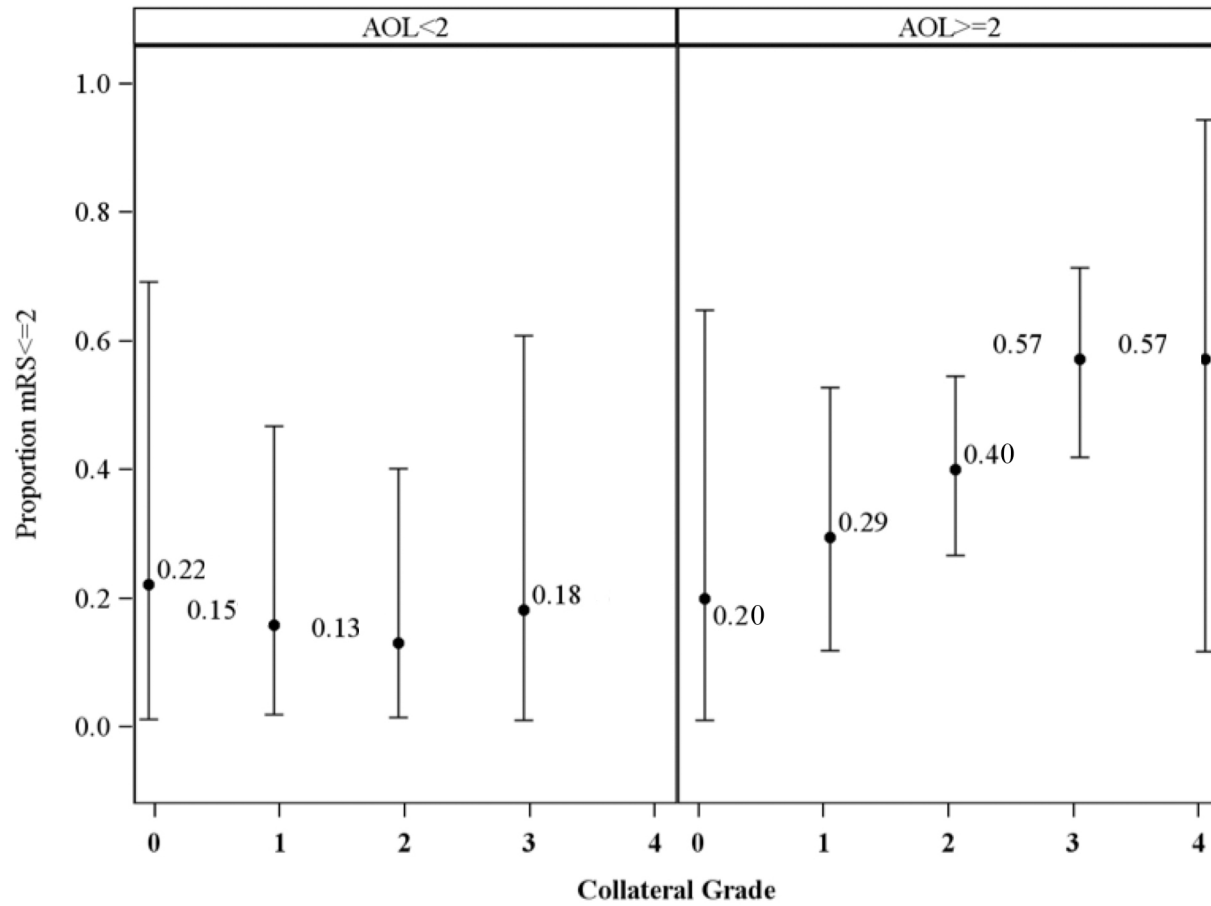

Supplement: NIHMS559931-supplement-Supplemental_Material.pdf [file NIHMS559931-supplement-Supplemental_Material.pdf]
